# Supplementary material
Source: PubMed Central journal article supplement (PMC2748991)

## Supporting Information

### Largamides A–C, Tiglic Acid-Containing Cyclodepsipeptides with Elastase-Inhibitory Activity from the Marine Cyanobacterium *Lyngbya confervoides*

Susan Matthew<sup>1</sup>, Valerie J. Paul<sup>2</sup>, Hendrik Luesch<sup>1</sup>

#### Affiliation

<sup>1</sup> Department of Medicinal Chemistry, University of Florida, Gainesville, Florida 32610, USA

<sup>2</sup> Smithsonian Marine Station, 701 Seaway Drive, Fort Pierce, Florida 34949, USA

#### Correspondence

Prof. Dr. Hendrik Luesch, Department of Medicinal Chemistry, University of Florida,  
1600 SW Archer Road, Gainesville, Florida 32610, USA. Email: luesch@cop.ufl.edu  
Phone: +1 (352) 273-7738, Fax: + 1 (352) 273-7741

| Contents                                                                               | Page Number |
|----------------------------------------------------------------------------------------|-------------|
| <sup>1</sup> H NMR Spectrum of Largamide B ( <b>2</b> ) in different NMR solvents      | S2          |
| <sup>1</sup> H NMR Spectrum of Largamide A ( <b>1</b> ) in DMF- <i>d</i> <sub>7</sub>  | S3          |
| <sup>13</sup> C NMR Spectrum of Largamide A ( <b>1</b> ) in DMF- <i>d</i> <sub>7</sub> | S4          |
| <sup>1</sup> H NMR Spectrum of Largamide B ( <b>2</b> ) in DMF- <i>d</i> <sub>7</sub>  | S5          |
| <sup>13</sup> C NMR Spectrum of Largamide B ( <b>2</b> ) in DMF- <i>d</i> <sub>7</sub> | S6          |
| 1D TOCSY Spectra of Largamide B ( <b>2</b> ) in DMF- <i>d</i> <sub>7</sub>             | S7          |
| <sup>1</sup> H NMR Spectrum of Largamide C ( <b>3</b> ) in DMF- <i>d</i> <sub>7</sub>  | S8          |
| <sup>13</sup> C NMR Spectrum of Largamide C ( <b>3</b> ) in DMF- <i>d</i> <sub>7</sub> | S9          |
| 1D TOCSY Spectra of Largamide C ( <b>3</b> ) in DMF- <i>d</i> <sub>7</sub>             | S10         |

$^1\text{H}$  NMR spectra of Largamide B (**2**) in different solvents

S2

$^1\text{H}$  NMR spectrum of largamide B (**2**) in  $\text{DMF-}d_7$

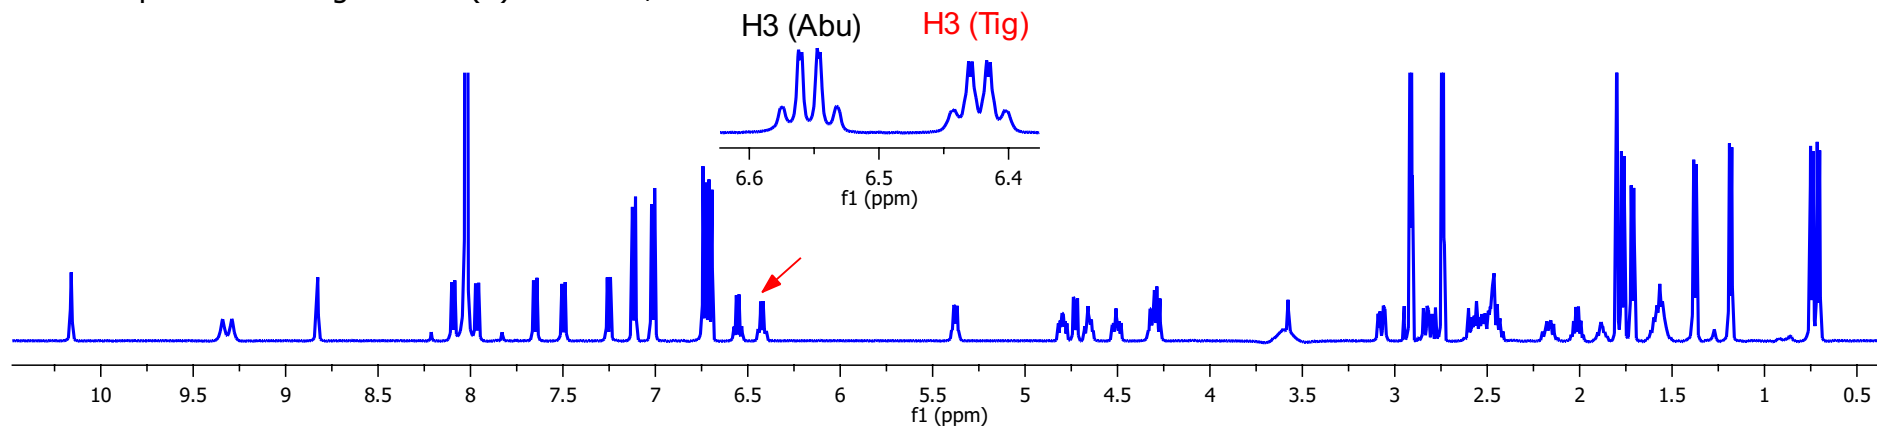

$^1\text{H}$  NMR spectrum of largamide B (**2**) in  $\text{CD}_3\text{OD}$

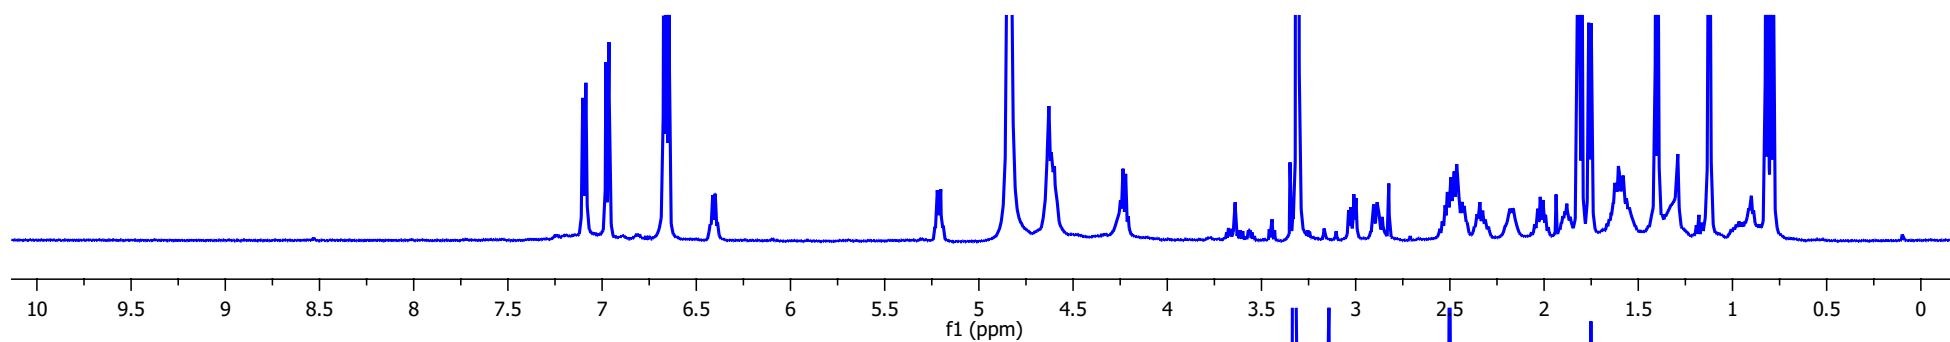

$^1\text{H}$  NMR spectrum of largamide B (**2**) in  $\text{DMSO-}d_6$

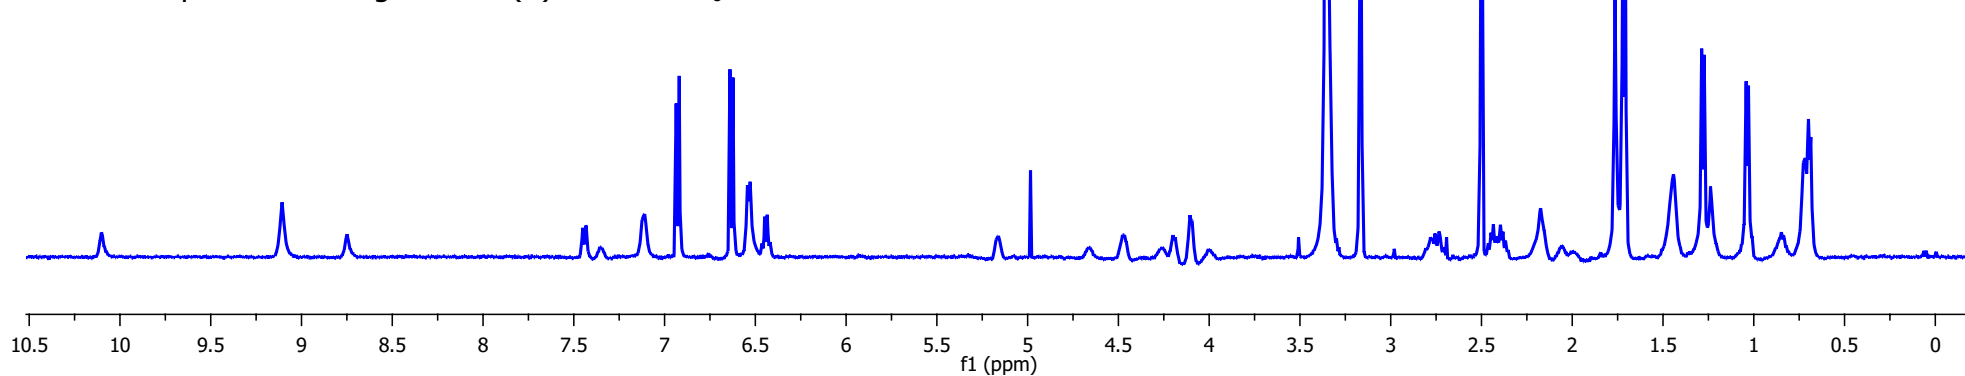

$^1\text{H}$  NMR (500 MHz) Spectrum of Largamide A (**1**) in  $\text{DMF-}d_7$

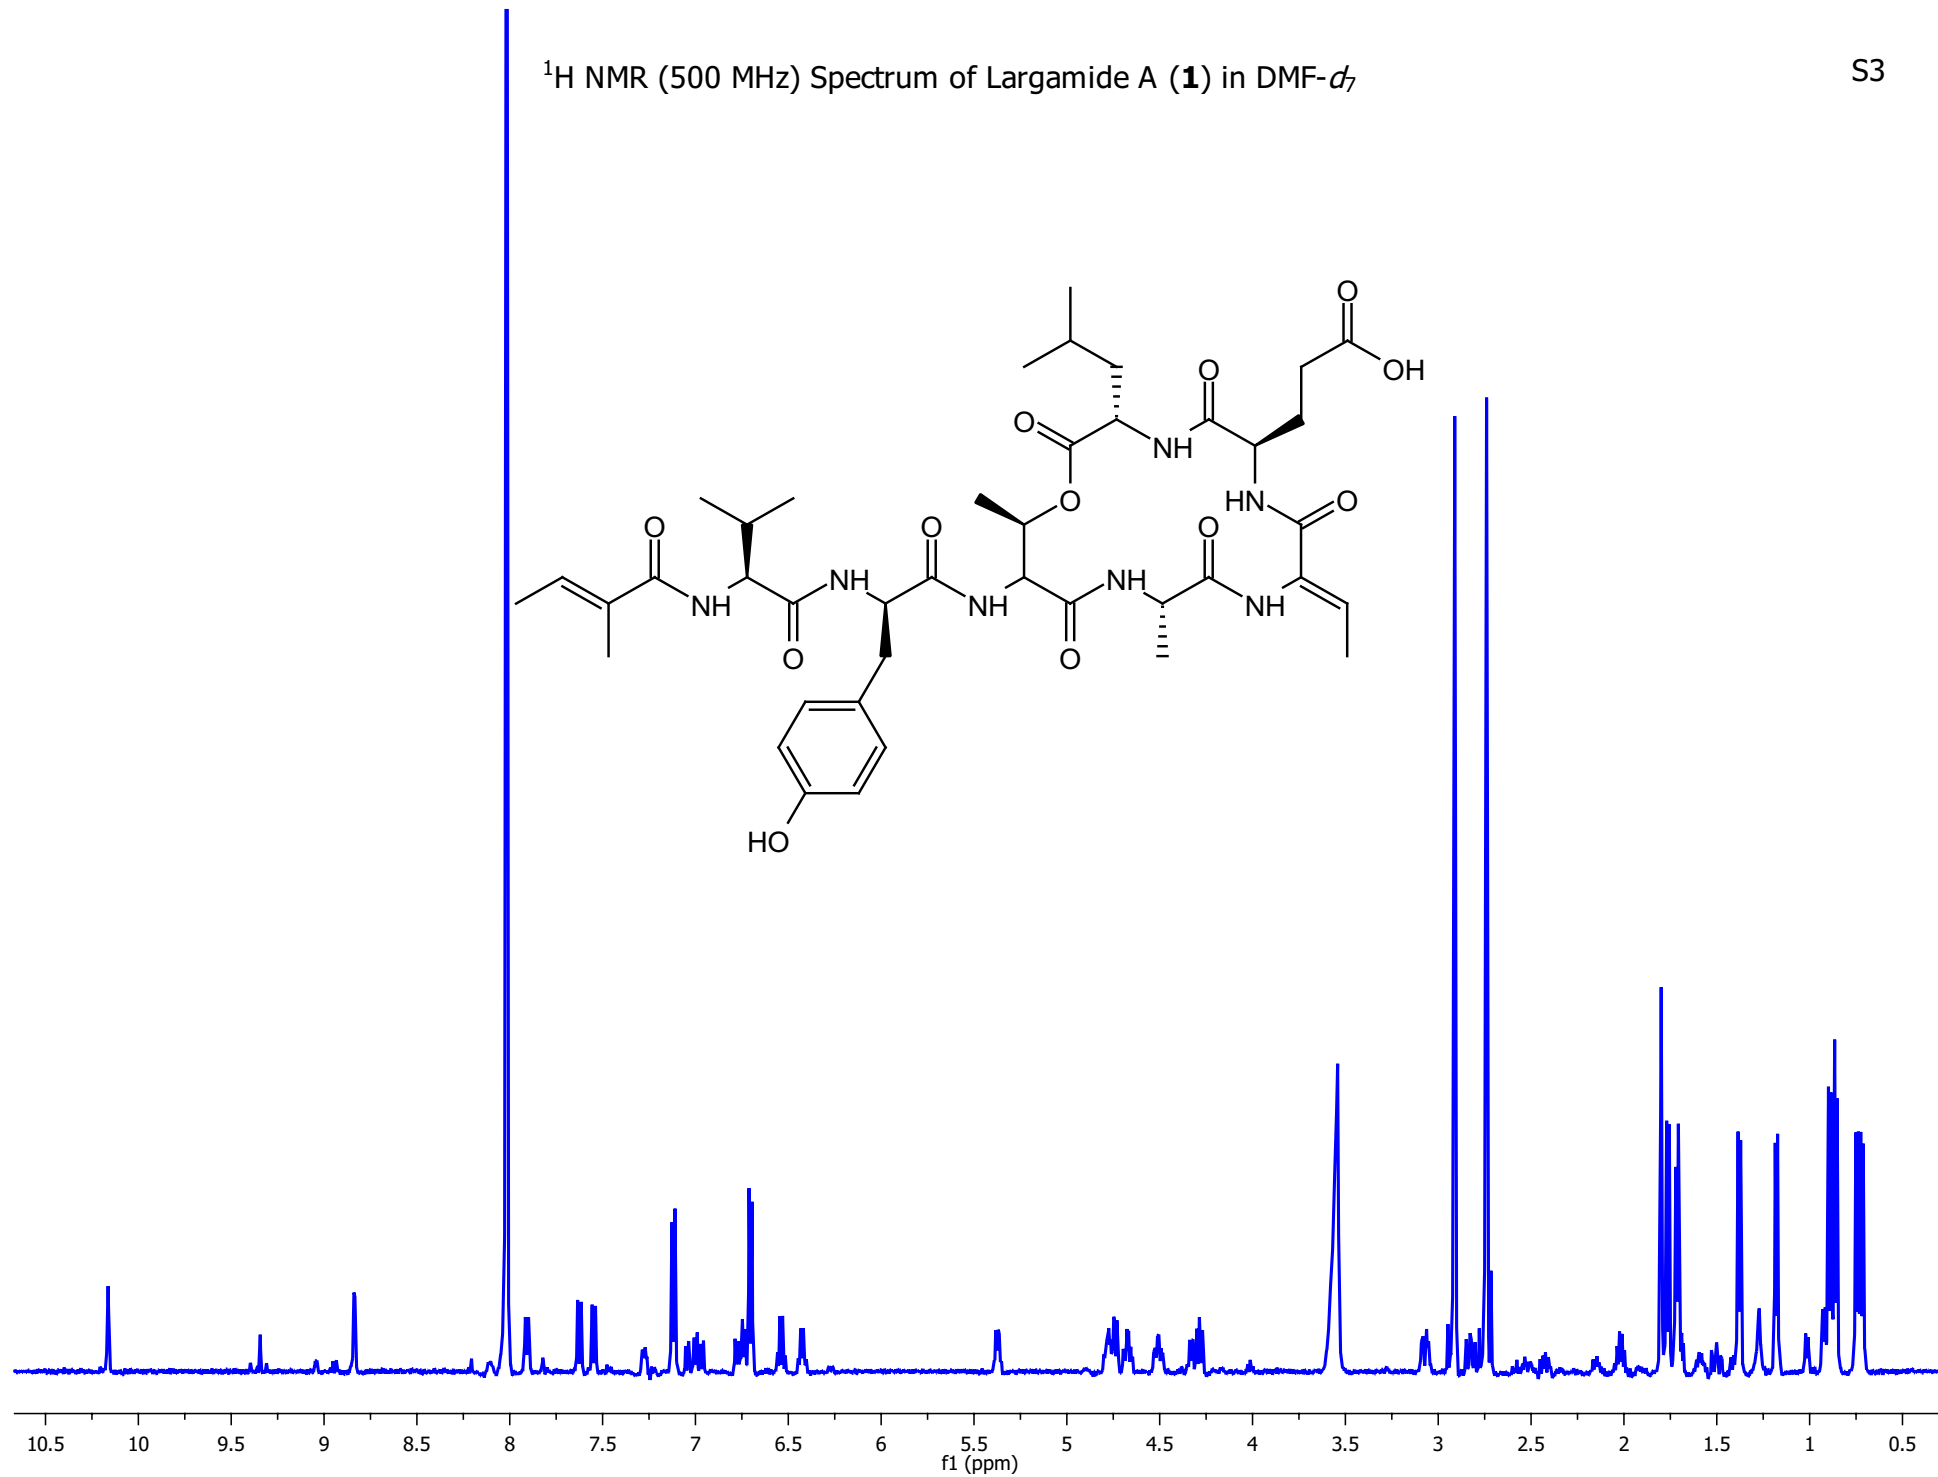

$^{13}\text{C}$  NMR (125 MHz) Spectrum of Largamide A (**1**) in  $\text{DMF-}d_7$ 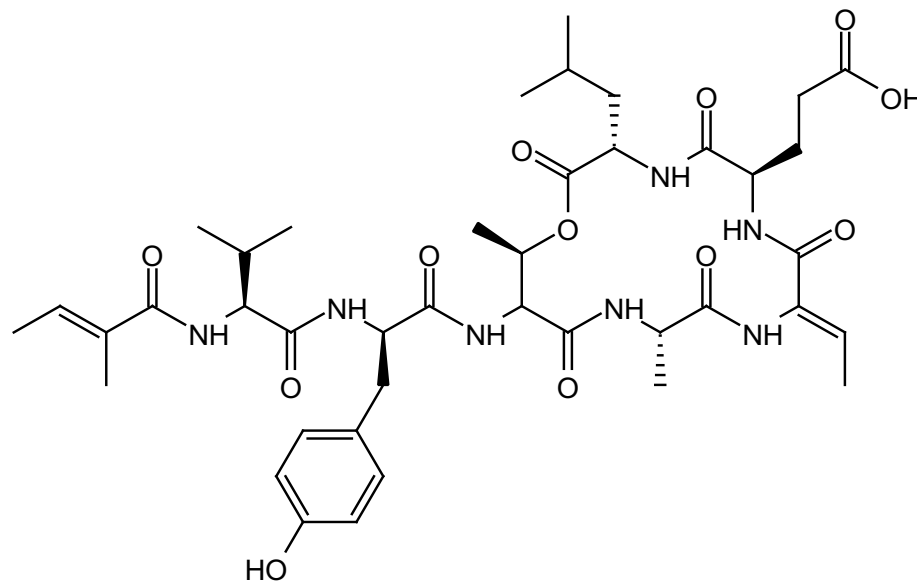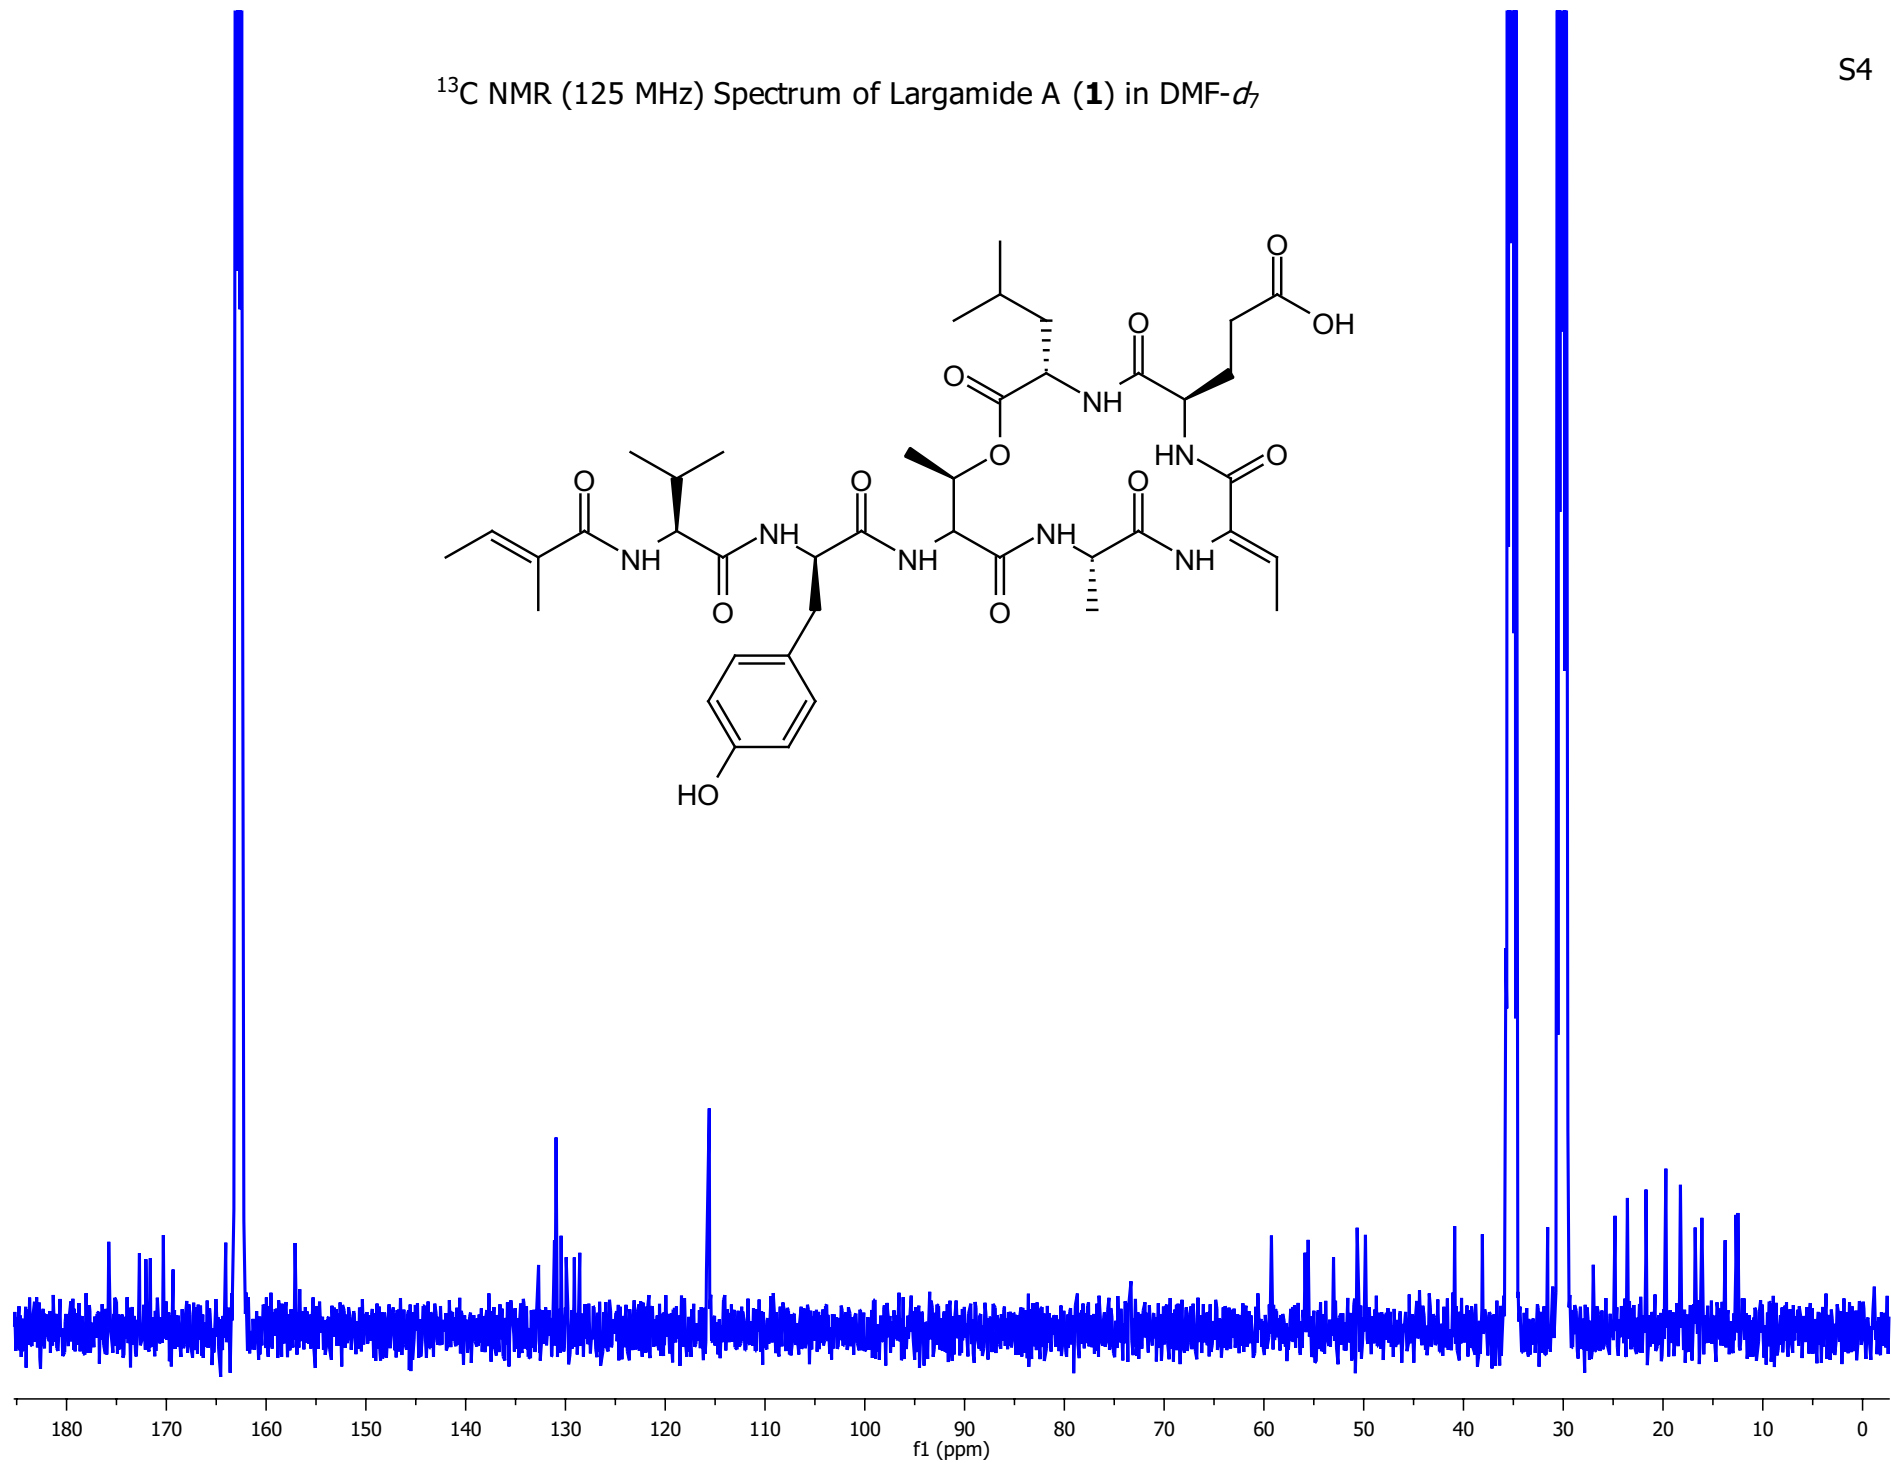

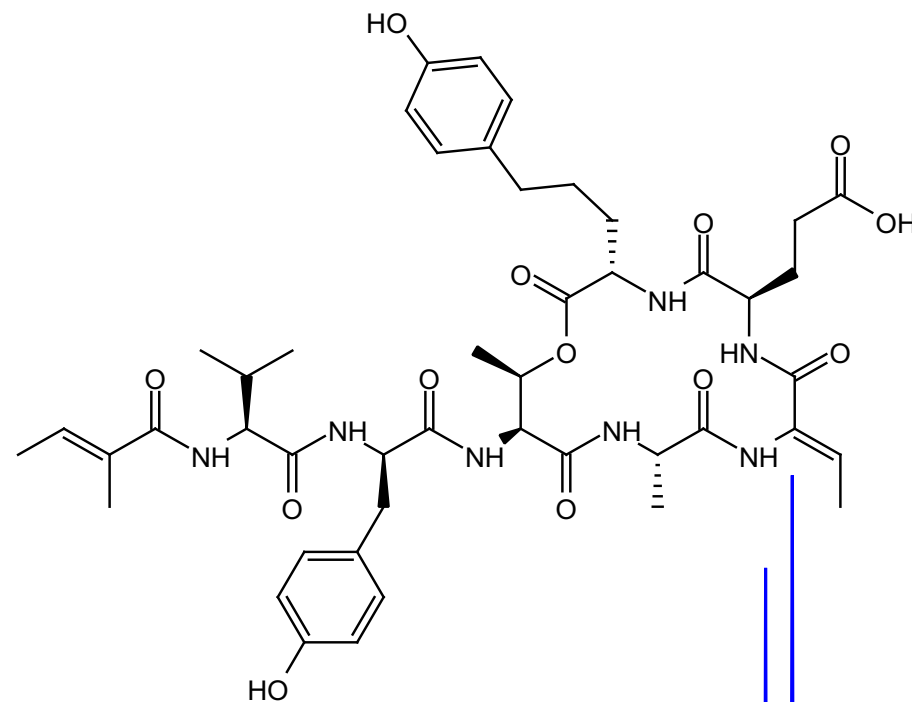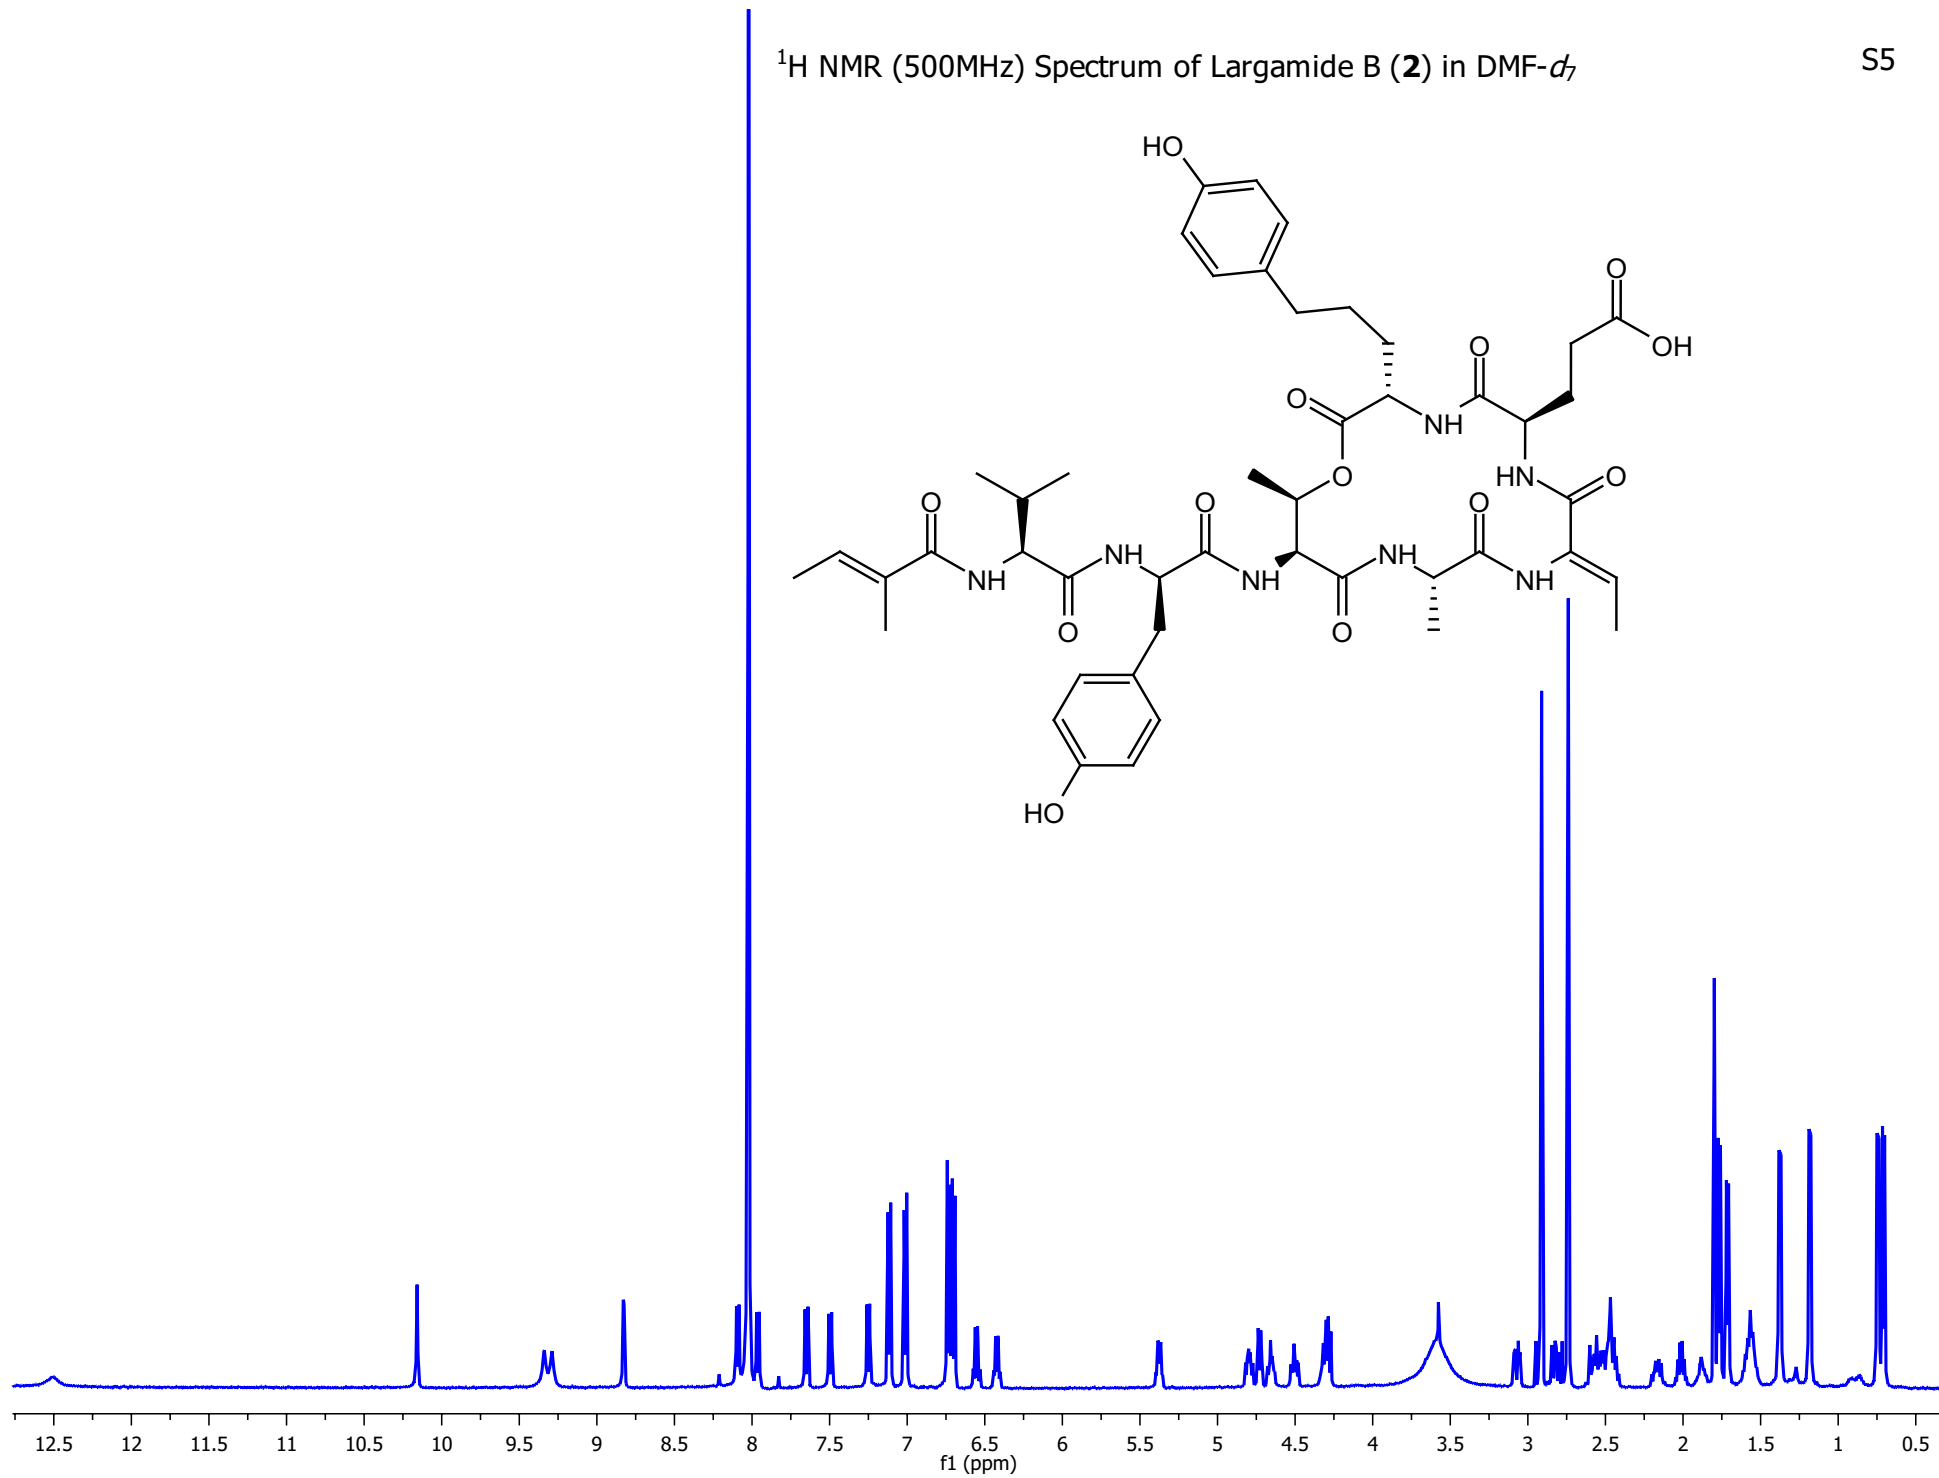

$^{13}\text{C}$  NMR (125 MHz) Spectrum of Largamide B (**2**) in  $\text{DMF-}d_7$

S6

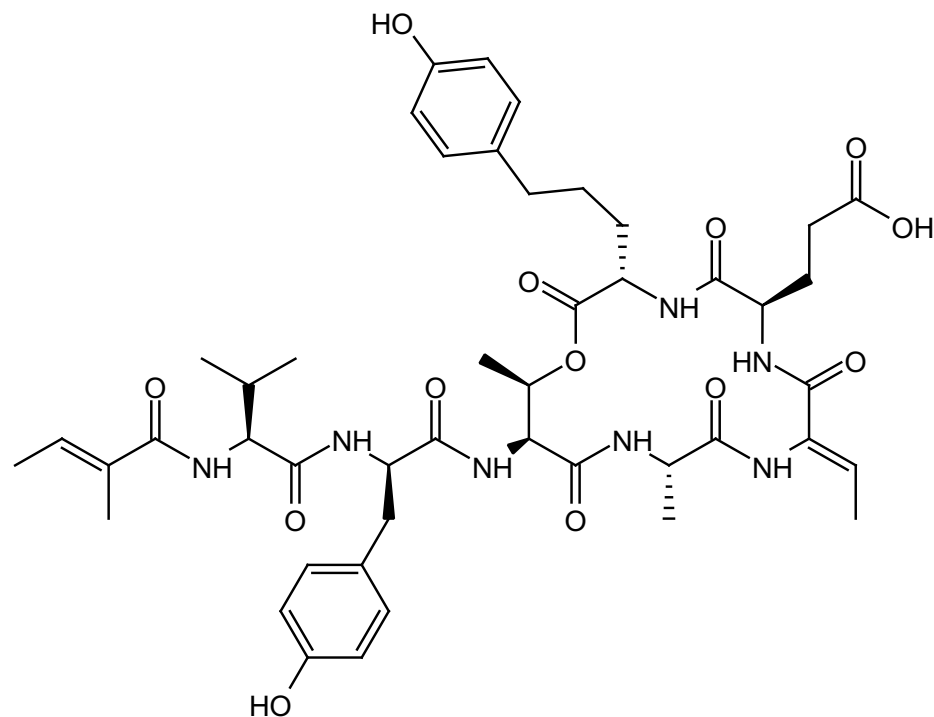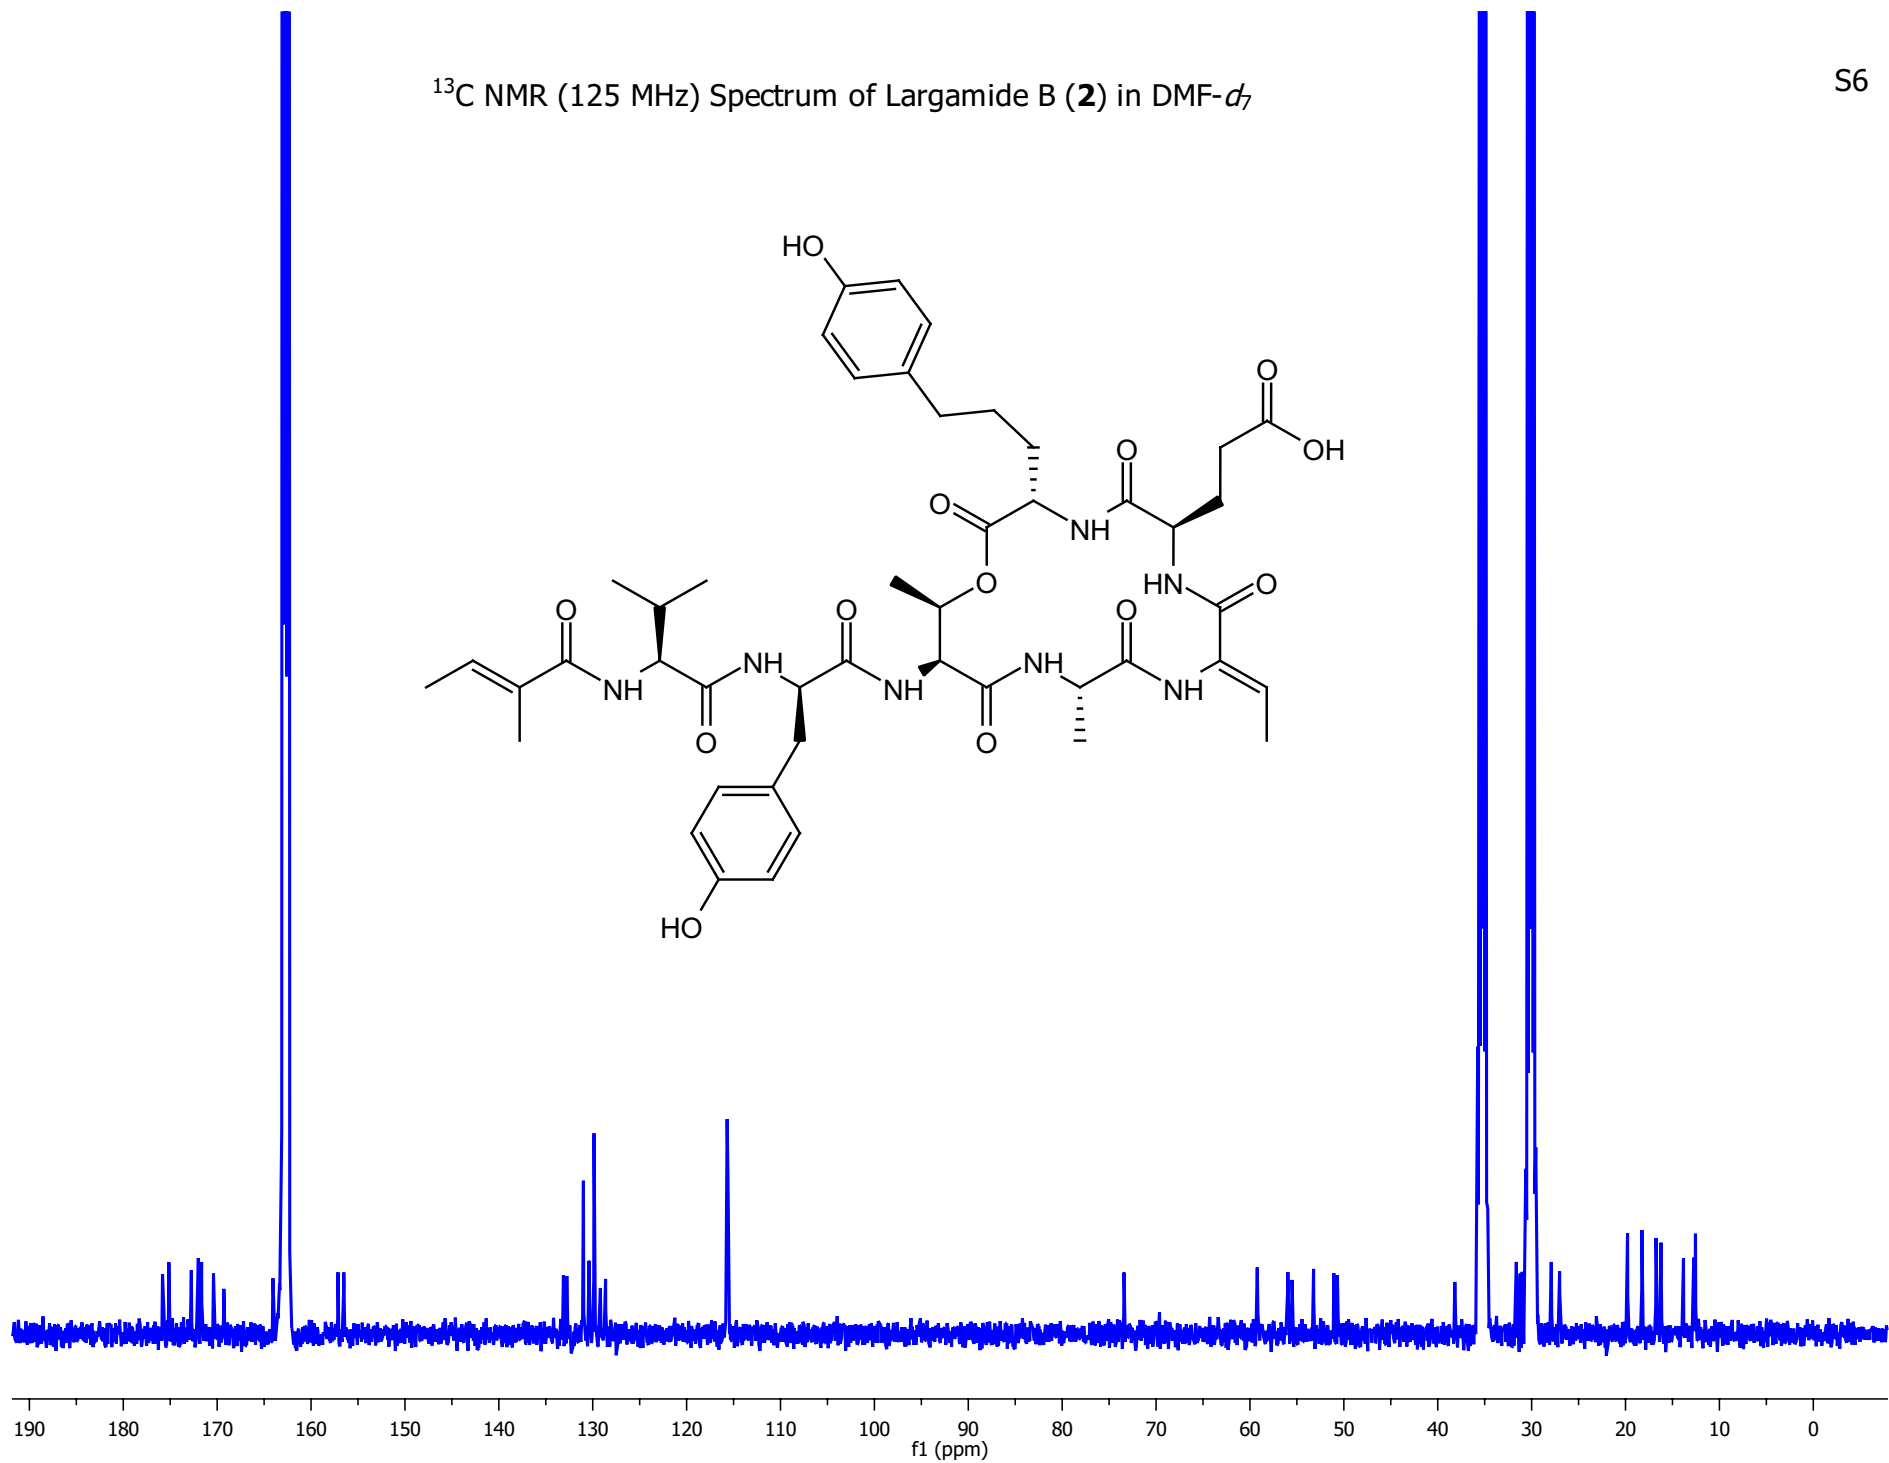

1D TOCSY Spectra of Largamide B (**2**) in DMF-*d*<sub>7</sub>, 500 MHz

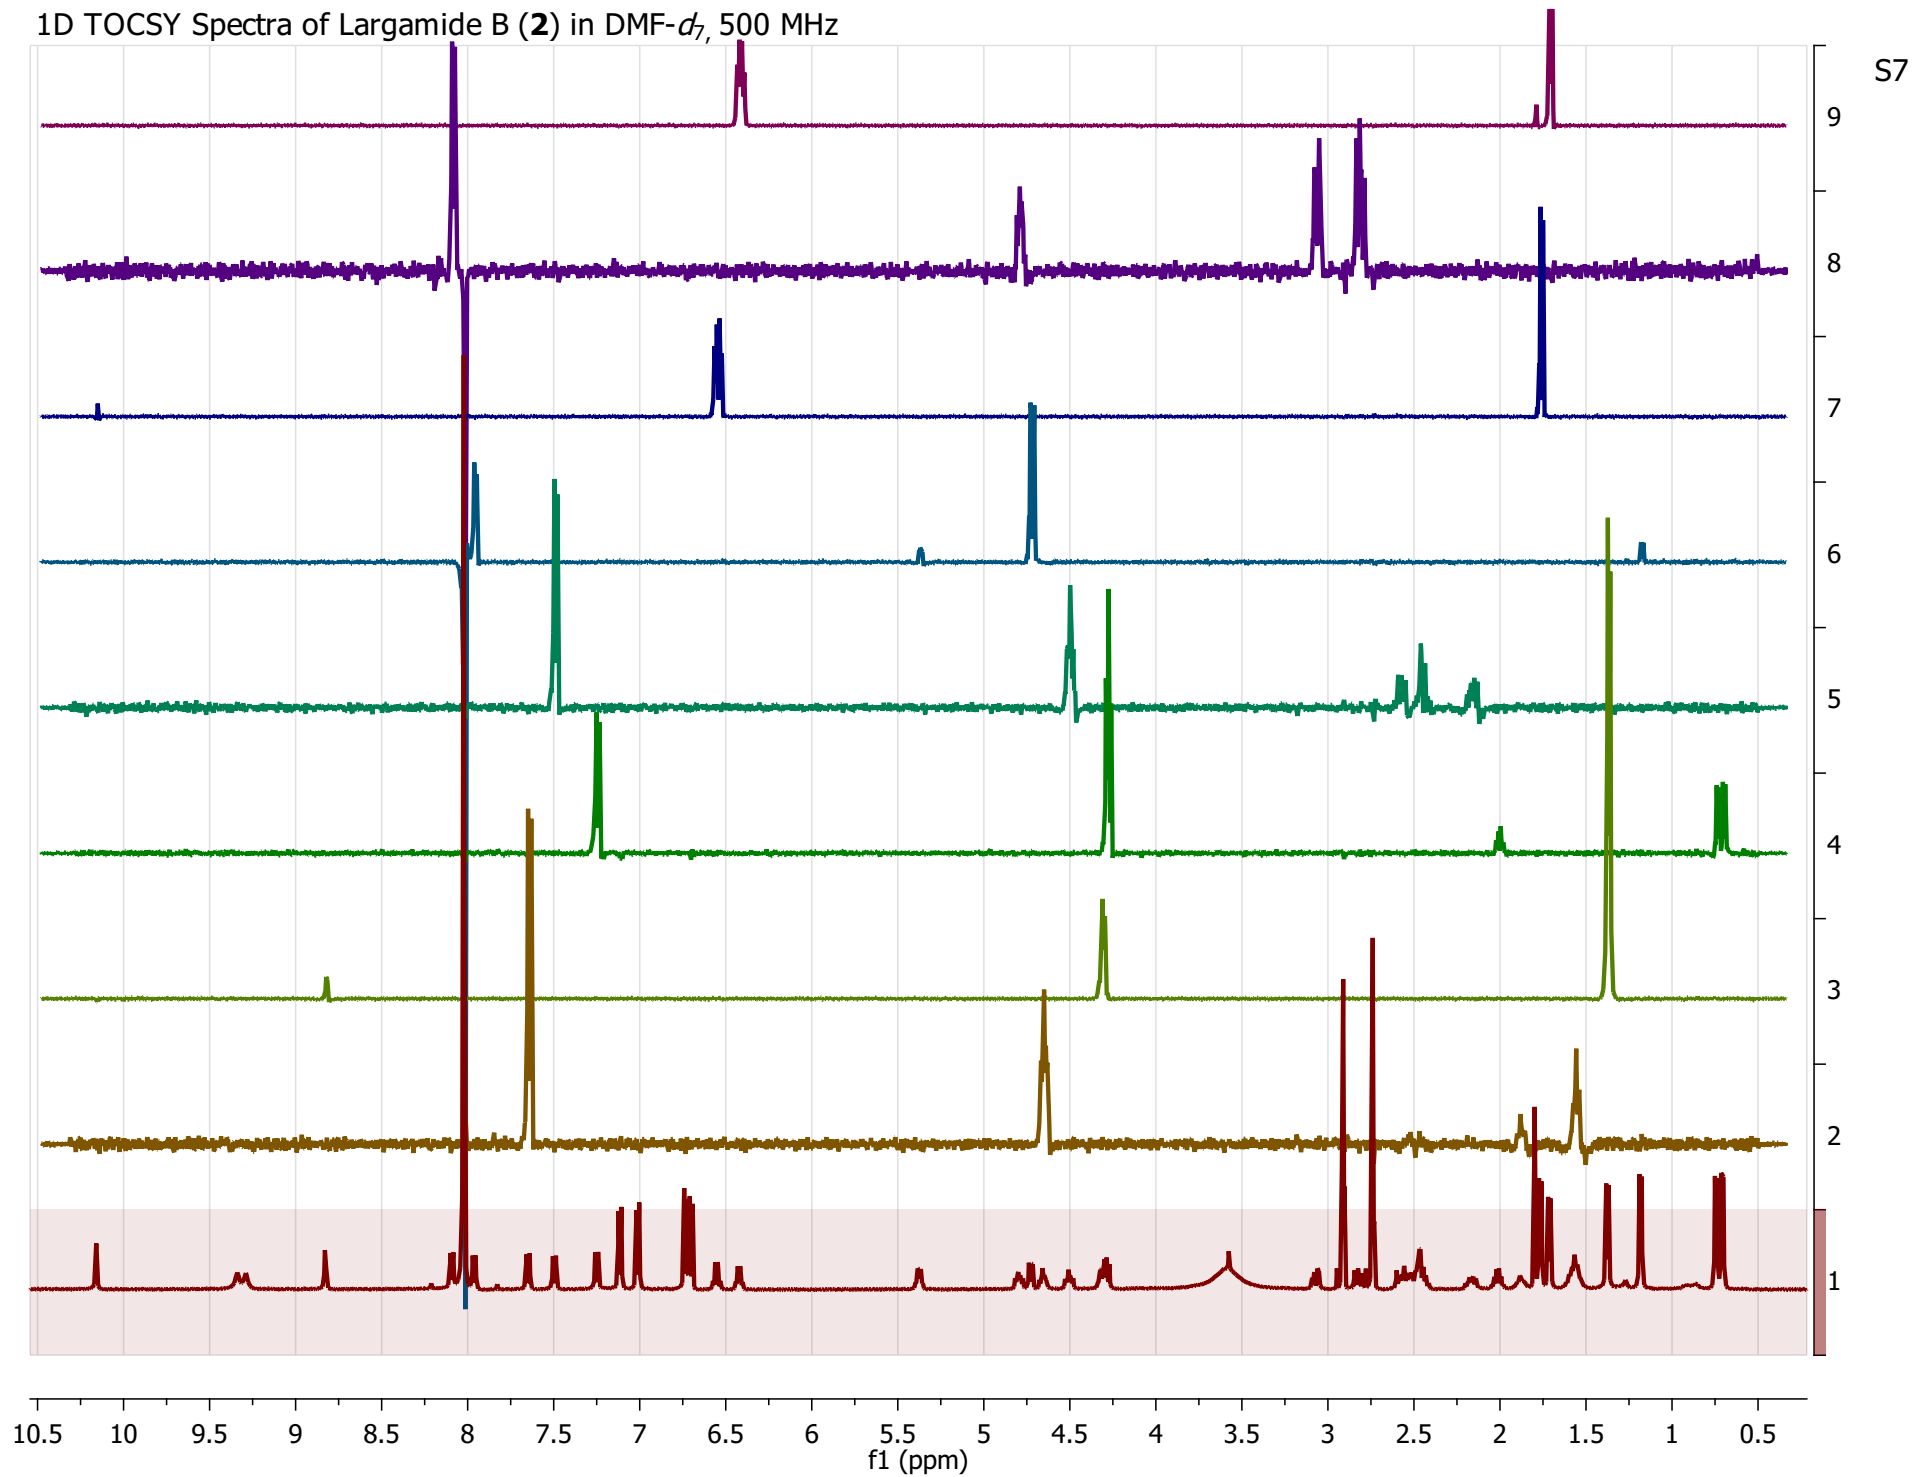

$^1\text{H}$  NMR (500 MHz) Spectrum of Largamide C (**3**) in  $\text{DMF-}d_7$ 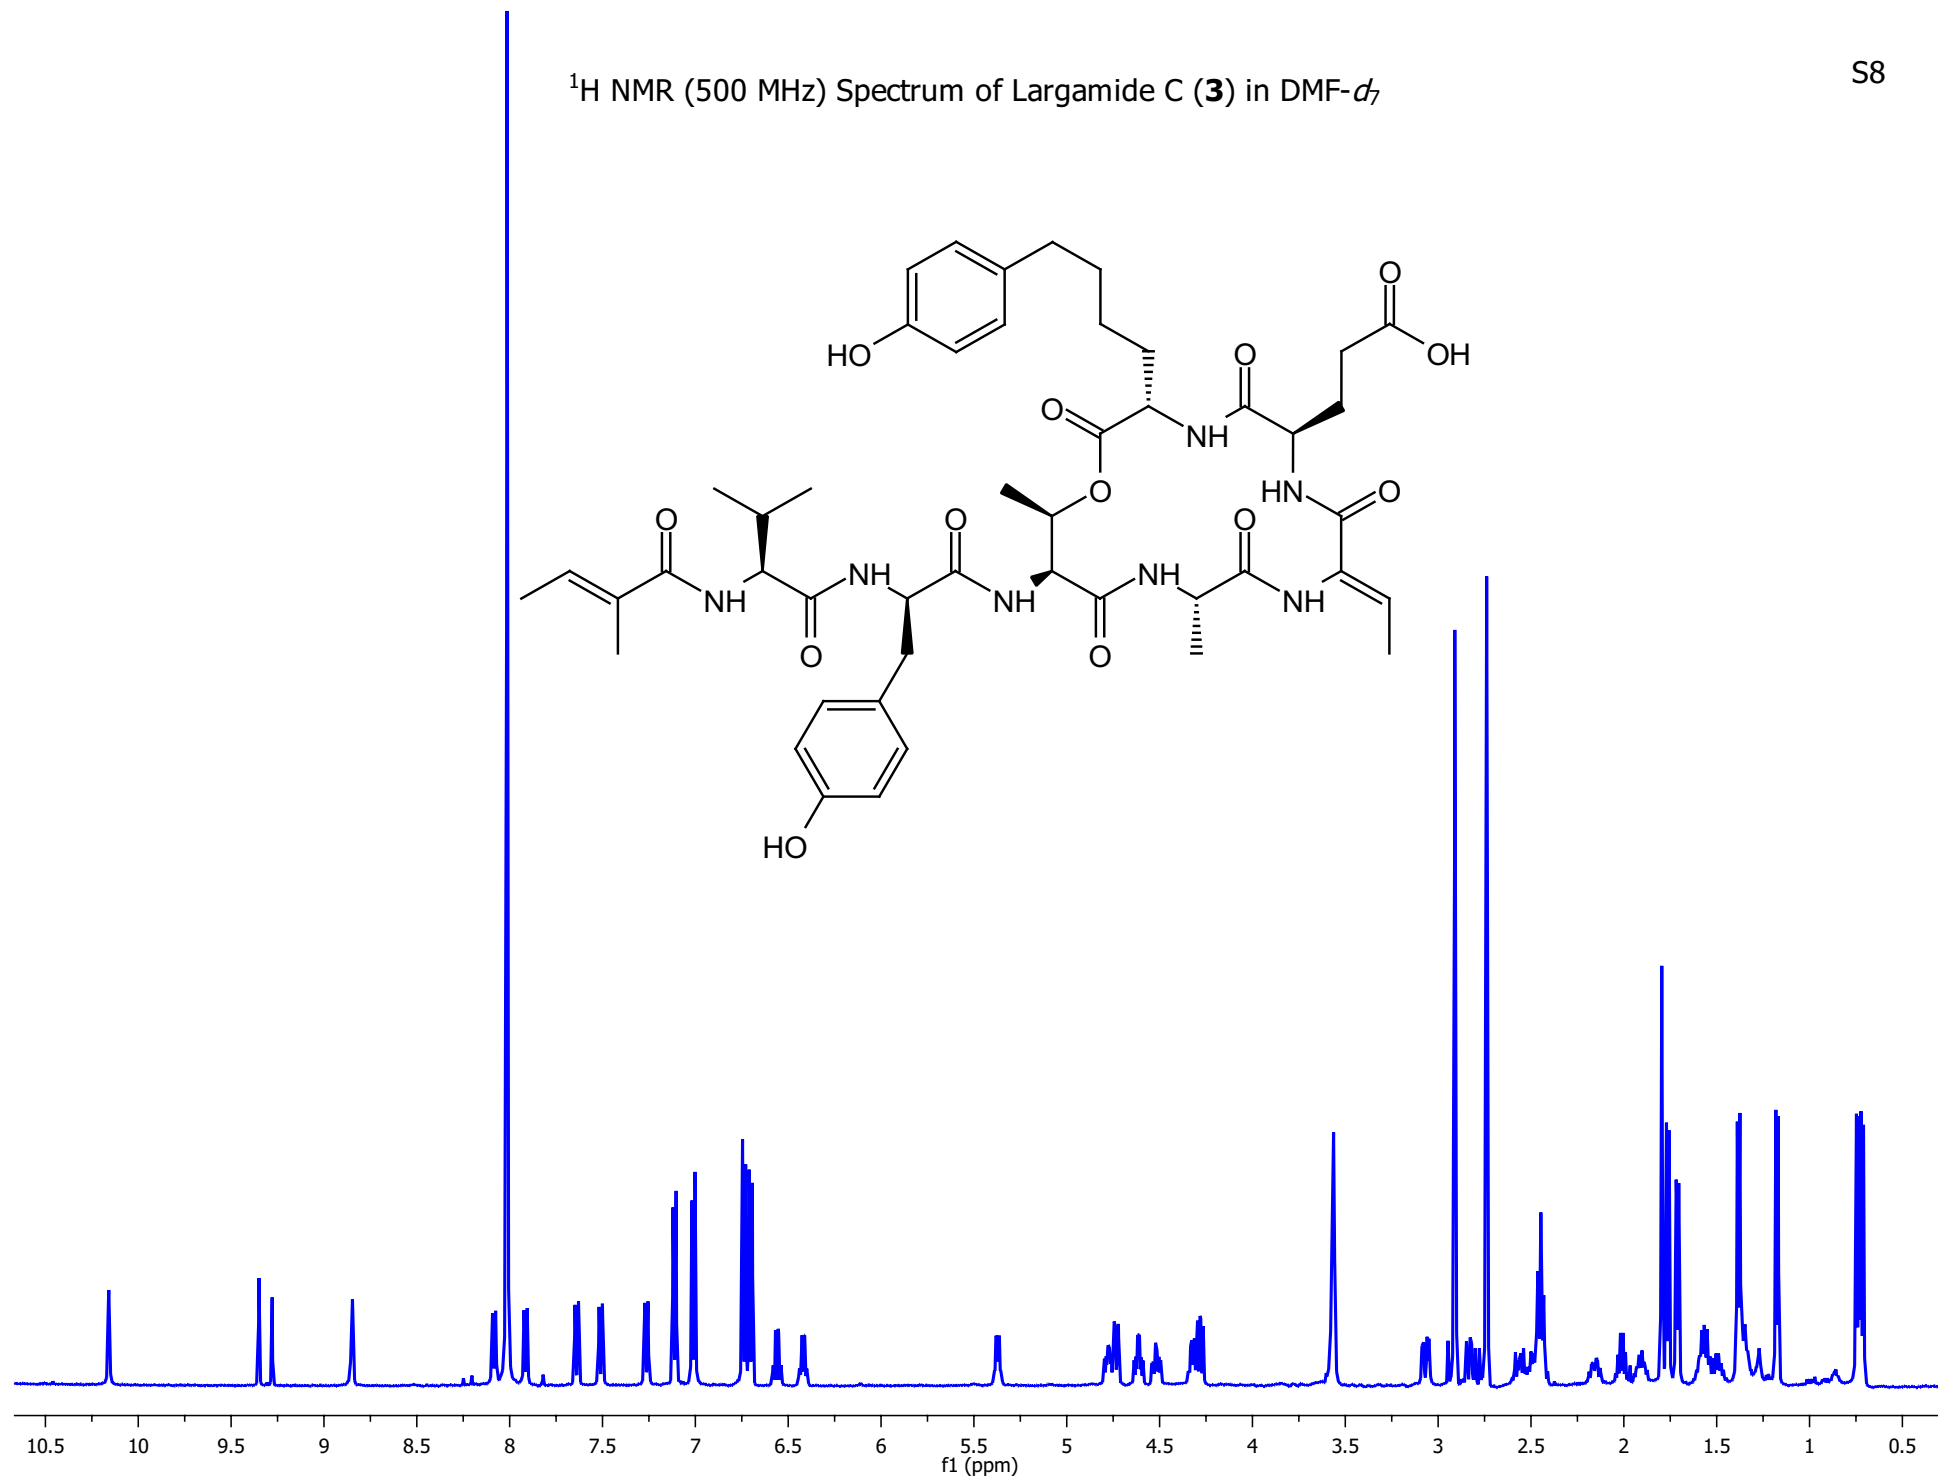





1D TOCSY Spectra of Largamide C (**3**) in DMF-*d*<sub>7</sub>, 500 MHz

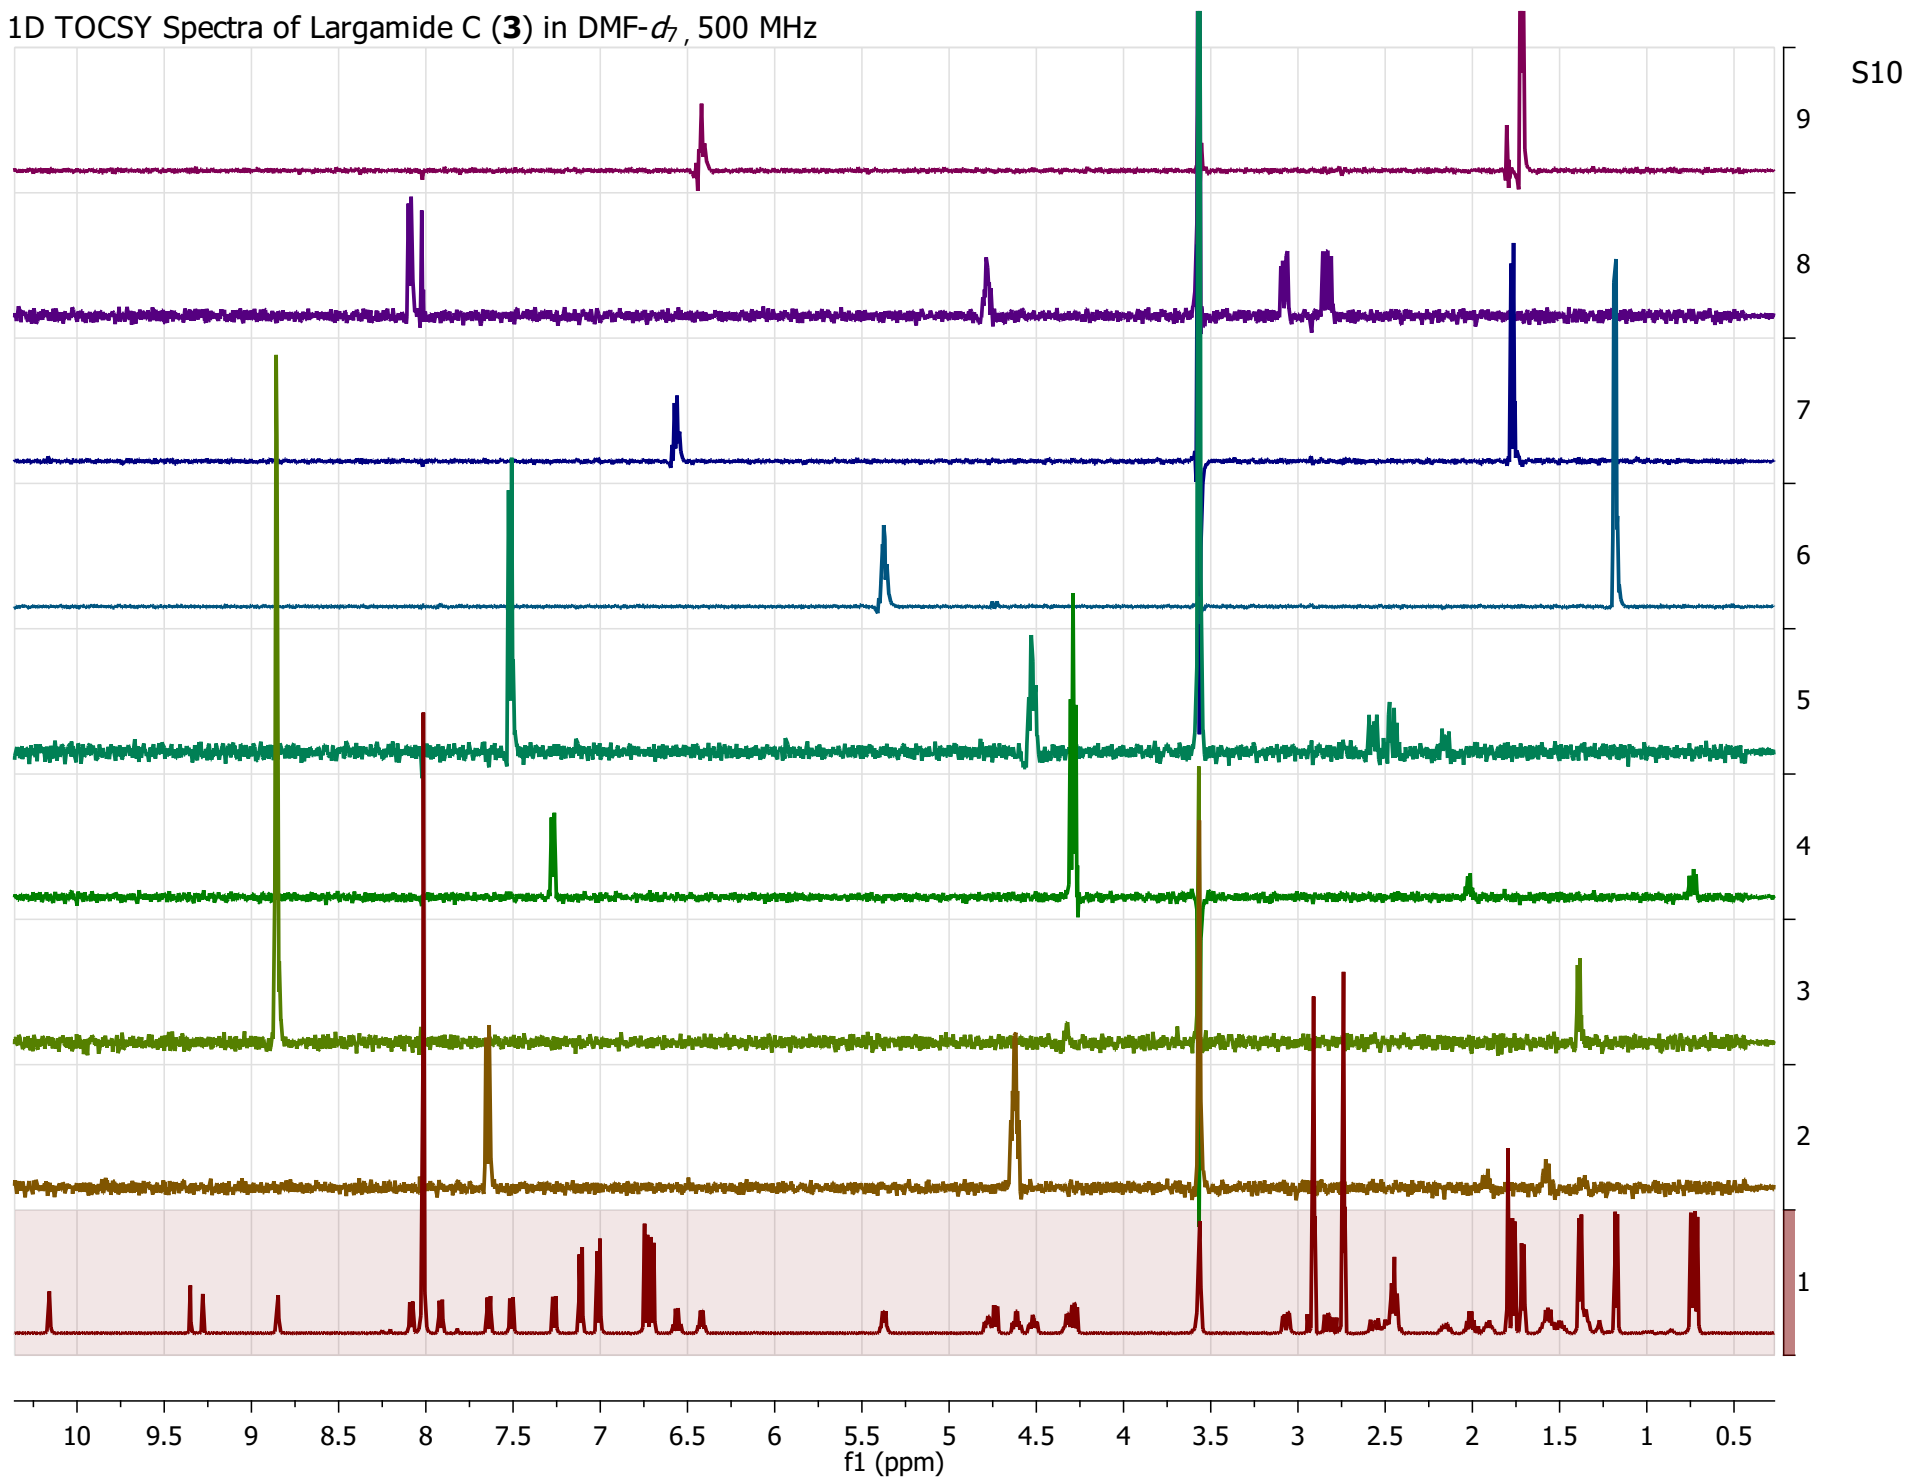

Supplement: NIHMS126756-supplement-Supporting_Information.pdf [file NIHMS126756-supplement-Supporting_Information.pdf]
